# Supplementary material for: A Synthesis of Metal-Organic Frameworks Using Terephthalic Acid Obtained from PET Bottles with Dye Adsorption for Application in Experimental Chemistry Classes
Source: Research Square preprint supplement (doi:10.21203/rs.3.rs-4688613/v1), 2024-08-11
Supplement: Supplementary file 1 [file 58c6113962e9174b15af37fc.docx]

**A Synthesis of Metal-Organic Frameworks Using Terephthalic Acid Obtained from PET Bottles with Dye Adsorption for Application in Experimental Chemistry Classes**

João M. R. Gonçalves¹, Júlia V. Brandão¹, Benedito S. Lima-Neto¹

¹Instituto de Química de São Carlos, Universidade de São Paulo, Avenida Trabalhador São Carlense, 400, 13566-590, São Carlos, SP, Brazil

[joaomanoel@usp.br](mailto:joaomanoel@usp.br)

# SUPPLEMENTARY MATERIAL

**Figure S1** NMR spectrum of ¹H of Terephthalic Acid (H₂TPA) obtained from PET in DMSO-d₆.

**Figure S2.** ¹³C NMR Spectrum of Terephthalic Acid (H₂TPA)obtained from PET in DMSO-d₆

**Figure S3.** NMR HSQC ¹H-¹³C spectrum Terephthalic Acid (H₂TPA) obtained from PET in DMSO-d₆.

**Figure S4.** NMR spectrum of ¹H of TPA²⁻(terephtalate anion) in DMSO-d₆.

**Figure S5.** NMR spectrum of ¹H of commercial Sigma-Aldrich Terephthalic Acid in DMSO-d₆.

**Figure S6.** FTIR spectrum of Terephthalic Acid (H₂TPA) obtained from PET bottles.


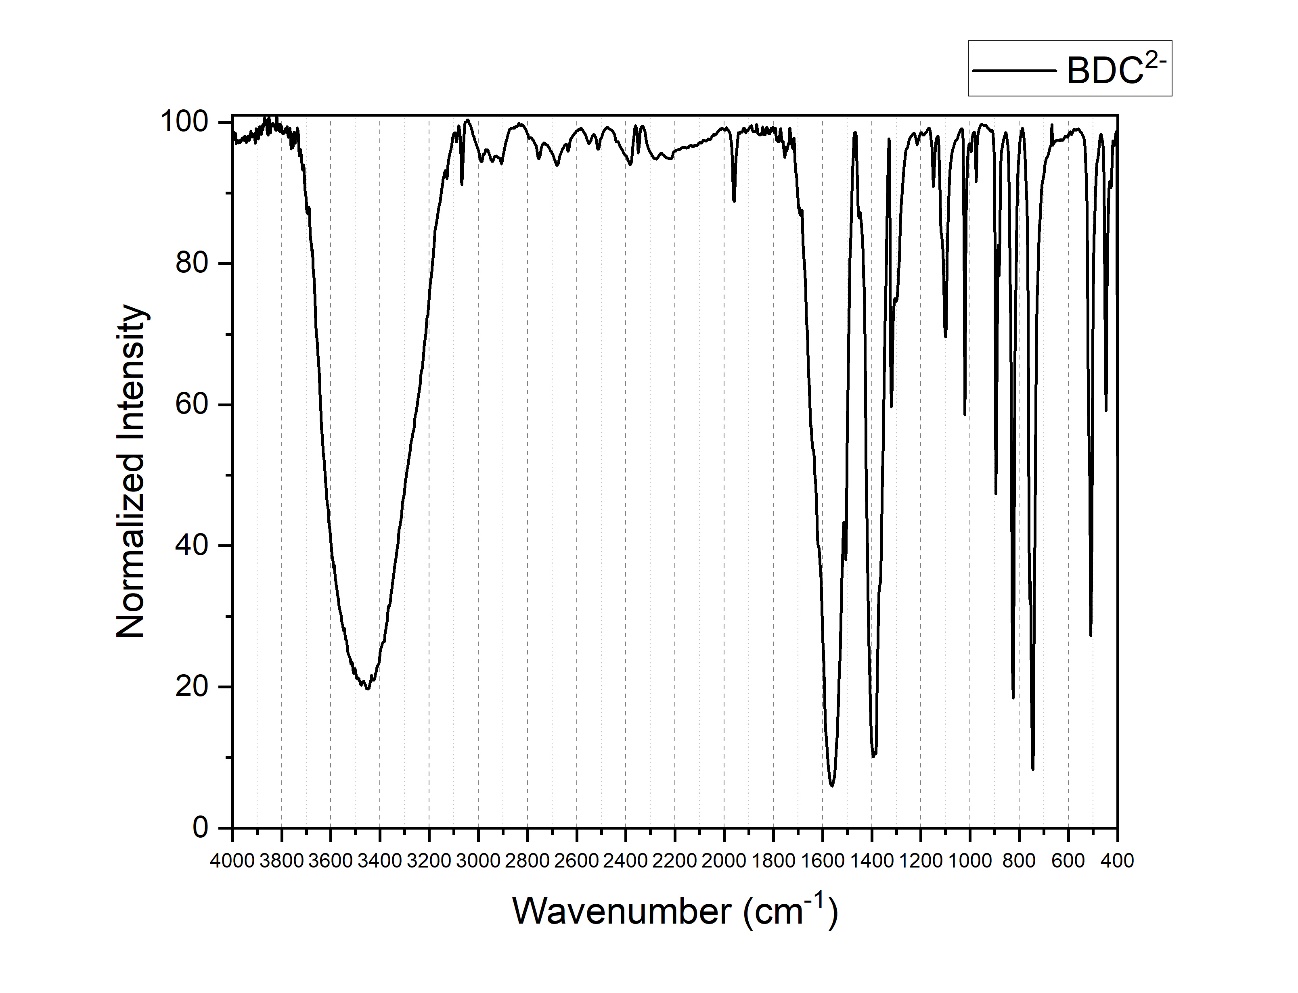


**Figure S7.** FTIR spectrum of Na₂TPA (sodium terephtalate) obtained during basic hidrolysis.
